# Supplementary material for: Structural, mechanical and electronic properties of Nb2C: first-principles calculations
Source: Royal Society of Chemistry journal article supplement (doi:10.1039/c7ra05856j), 2017-01-01

## Supplementary Information

### **Structural, mechanical and electronic properties of Nb<sub>2</sub>C: first-principles calculations**

Xiaojing Sha, Namin Xiao, Yongjun Guan, and Xiaosu Yi\*

Materials Genome Center, Beijing Institute of Aeronautical Materials, Beijing, P.

R. China.

**Figure SI** | Calculated enthalpies as the function of pressure.

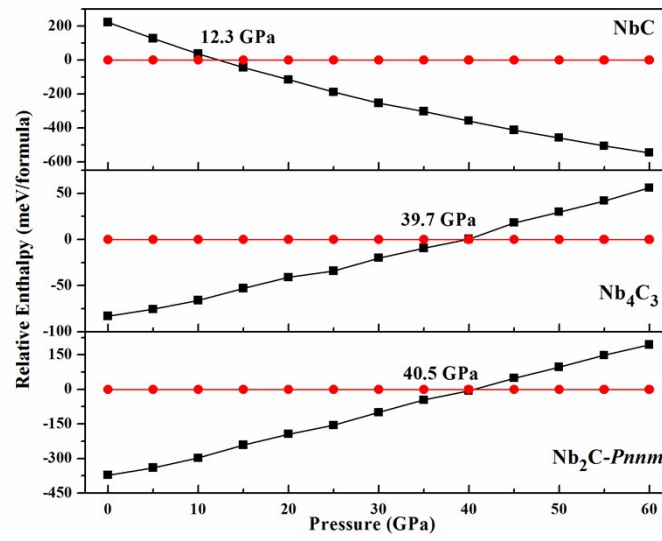

Supplement: c7ra05856j1.pdf [file c7ra05856j1.pdf]
